# Supplementary material for: Multifunctional iron oxide/silk-fibroin (Fe3O4–SF) composite microspheres for the delivery of cancer therapeutics
Source: Royal Society of Chemistry journal article supplement (doi:10.1039/c4ra05919k), 2014-01-01
Supplement: c4ra05919k1.pdf [file c4ra05919k1.pdf]

## Multifunctional iron oxide/silk-fibroin (Fe<sub>3</sub>O<sub>4</sub>-SF) composite microspheres for the delivery of cancer therapeutics

Haiyun Zhang, Xilan Ma\*, Chuanbao Cao\*, Meina Wang, Youqi Zhu

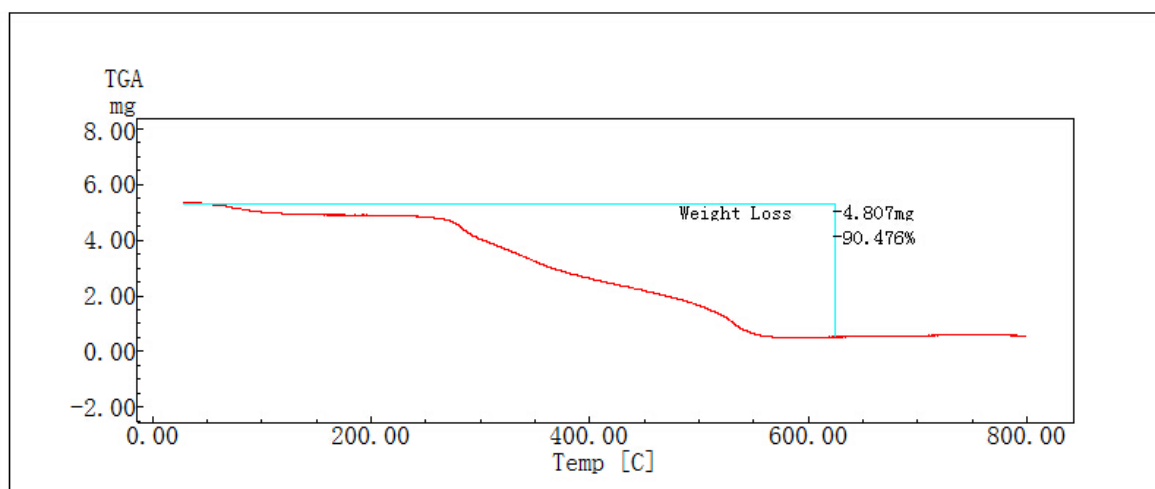

Fig.S1 TGA image of Fe<sub>3</sub>O<sub>4</sub>-SF composite microspheres at 800°C under the air atmosphere (5.313mg).

In order to calculate iron oxide particles content, TGA test was studied under the air atmosphere. From fig.S1, the silk was completely lost at ~630°C and the residuum was Fe<sub>2</sub>O<sub>3</sub>. According to the chemical equation, we can calculate that the quality percentage of Fe<sub>3</sub>O<sub>4</sub> is ~9.2%.

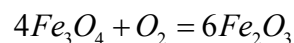

In the process of preparation, 0.5wt% SF solution and 0.5wt% Fe<sub>3</sub>O<sub>4</sub> solution were mixed in a volume ratio of 40:1. The Fe<sub>3</sub>O<sub>4</sub> content should be 2.5% theoretically. However, not all the silks were precipitated in the salting out process and part of them were lost. Then the Fe<sub>3</sub>O<sub>4</sub> content was increased and the quality percentage of Fe<sub>3</sub>O<sub>4</sub> is ~9.2%.
